1 **Correlative Light Electron Ion Microscopy reveal *in vivo***  
2 **localisation of bedaquiline in *Mycobacterium***  
3 ***tuberculosis* infected lungs**  
4  
5

6 Antony Fearn<sup>1</sup>, Daniel J. Greenwood<sup>1¶</sup>, Angela Rodgers<sup>1</sup>, Haibo Jiang<sup>2\*</sup>, Maximiliano G.  
7 Gutierrez<sup>1\*</sup>

8  
9 <sup>1</sup>Host-pathogen interactions in tuberculosis laboratory, The Francis Crick Institute, London,  
10 UK.

11 <sup>2</sup> School of Molecular Sciences, University of Western Australia, Perth, Australia.

12 <sup>¶</sup>Present address: ETH, Zurich, Switzerland

13  
14 \*Correspondence to: [max.g@crick.ac.uk](mailto:max.g@crick.ac.uk), [haibo.jiang@uwa.edu.au](mailto:haibo.jiang@uwa.edu.au)  
15  
16

17 **Abstract**

18 Correlative light, electron and ion microscopy (CLEIM) offers huge potential to track the  
19 intracellular fate of antibiotics, with organelle-level resolution. However, a correlative  
20 approach that enables subcellular antibiotic visualisation in pathogen-infected tissue is lacking.  
21 Here, we developed CLEIM in tissue (CLEIMiT), and used it to identify the cell-type specific  
22 accumulation of an antibiotic in lung lesions of mice infected with *Mycobacterium*  
23 *tuberculosis*. Using CLEIMiT, we found that the anti-TB drug bedaquiline is localised not only  
24 in foamy macrophages in the lungs during infection but also accumulate in polymorphonuclear  
25 (PMN) cells.  
26  
27

28 **Introduction**

29 An effective chemotherapy against bacterial infections must include antibiotics with  
30 pharmacokinetic properties that together allow penetration into all infected  
31 microenvironments[1]. Antimicrobial penetration is especially important for the treatment of  
32 infections where antibiotics need to reach intracellular bacteria[2], including *Mycobacterium*  
33 *tuberculosis*. In tuberculosis, treatment requires at least three antibiotics for six months[3], and  
34 we do not fully understand why this extended treatment is needed. In this context,  
35 understanding how tissue environments affect antibiotic localisation, exposure, and  
36 consequently efficacy against the pathogen, is crucial [4].  
37

38 Although it is critical to define if antimicrobials are able to reach their intracellular targets,  
39 imaging of antibiotics (and drugs in general) at the subcellular level in infected tissues remains  
40 challenging. Only recently have studies *in vivo* determined antibiotic distributions in  
41 granulomatous lesions by matrix-assisted laser desorption-ionisation mass spectrometric  
42 imaging (MALDI-MSI)[5]. However, this approach only allows analysis at the tissue level and  
43 does not reach subcellular or even cellular resolution[6]. On the other hand, nanoscale  
44 secondary ion mass spectrometry (nanoSIMS) has been used to visualise drugs at 50 nm  
45 resolution in cells [7] and tissues [8]. However, there are limitations with this method such as  
46 the lack of correlation with other available imaging modalities that provide spatial information  
47 of specific cell types localisation and function. Thus, correlative approaches are needed to  
48 obtain both spatial localisation of drugs and biologically relevant information from  
49 experimental systems[9]. Recently, a correlative imaging approach combining light, electron  
50 and ion microscopy (CLEIM) has been developed for subcellular antibiotic visualisation *in*  
51 *vitro* cultured cells [10]. However, there are currently no approaches available that allow  
52 correlative studies at the subcellular resolution *in vivo*.

53

## 54 Results

55

56 With the aim to define the subcellular localisation of antibiotics in infected cells within tissues,  
57 we used a mouse model of tuberculosis. Our goal was to develop an imaging approach to  
58 analyse the distribution of antibiotics from complex tissues to individual cells at the subcellular  
59 level in infected lungs. For that, we infected susceptible C3HeB/FeJ mice with *Mycobacterium*  
60 *tuberculosis* H37Rv expressing fluorescent E2-Crimson via aerosol infection (**Figure 1A**). The  
61 C3HeB/FeJ susceptible mouse strain develops necrotic lesions in the lung that better  
62 recapitulate human granulomas, a hallmark of tuberculosis infection[11]. After 21 days of  
63 infection, mice were treated daily for five days either with control vehicle or 25 mg/kg of the  
64 anti-mycobacterial antibiotic bedaquiline (BDQ). As previously reported[12], this treatment  
65 reduced approximately ten-fold the bacterial loads in the lungs, as measured by colony forming  
66 units (CFU) counting (**Figure S1A/B**). Following treatment, mice were euthanised and fixed  
67 by perfusion with formalin. Lungs were removed and granulomatous lesions were visualised  
68 by Micro Computed Tomography ( $\mu$ CT, **Figure 1A, Figure S1C and Movie S1**). Replicate  
69 lung tissues were embedded in agarose for further processing and imaging.

70

71 One of the main technical challenges of our attempt to define if the antibiotic reached  
72 intracellular bacteria was to identify and correlate across the different imaging modalities and  
73 scales the infected cells present in the lung. We devised a strategy that included the  
74 identification of a granulomatous lesion within 100  $\mu$ m thickness sections and non-destructive  
75 3D imaging by confocal laser scanning microscopy of the entire section as well as the region  
76 of interest (**Figure 1B and 1C**). Vibratome sections were stained with DAPI to visualise nuclei  
77 and BODIPY 493/503 to visualise lipid droplets (LD), previously shown to accumulate in  
78 foamy macrophages in necrotic lesions[13]. In agreement with previous studies, we found that  
79 granulomatous lesions were heavily enriched in LD-laden foamy macrophages (**Figure 1B and**  
80 **1C**). After fluorescence imaging, sections were recovered and resin embedded for electron  
81 microscopy. In order to correlate the 3D fluorescence microscopy with the electron

82 microscopy, sections were analysed by  $\mu$ CT 3D scanning (**Figure S2**). This approach enabled  
83 the precise localisation of the ROI previously imaged by fluorescence, and the angle correction  
84 during sectioning (**Figure S2**). In this way, the section obtained for Scanning Electron  
85 Microscopy (SEM) and nanoSIMS could be matched to the 3D fluorescence image with a high  
86 degree of accuracy (**Figure S2**). The sections were then imaged by SEM (**Figure 1D**) and the  
87 same section was then coated with 5 nm gold and transferred for nanoSIMS analysis. BDQ  
88 contains a bromine atom, so we determined its localisation by the intensity of the  $^{79}\text{Br}^-$  ion  
89 signal[10]. The regions imaged by SEM were identified using the optical microscope in the  
90 nanoSIMS. The sample was scanned with a focused  $^{133}\text{Cs}^+$  and secondary ions ( $^{12}\text{C}^-$ ,  $^{12}\text{C}^{14}\text{N}^-$ ,  
91  $^{79}\text{Br}^-$ ,  $^{32}\text{S}^-$  and  $^{31}\text{P}^-$ ) and secondary electrons were collected (**Figure 1E**). The  $^{12}\text{C}^{14}\text{N}^-$  and  $^{31}\text{P}^-$   
92 signals were useful to show the morphology of cells and tissues, with  $^{12}\text{C}^{14}\text{N}^-$  signals largely  
93 from proteins and the highest  $^{31}\text{P}^-$  signals are from nucleic acids and structures we believe are  
94 polyphosphates in Mtb.

95 To correlate across imaging modalities with subcellular resolution, endogenous structures were  
96 used as landmarks. LD were located by fluorescent staining in the optical image, ultrastructure  
97 in the SEM image, and  $^{32}\text{S}^-$  signal in the ion image. The  $^{32}\text{S}^-$  signal was due to the  
98 osmium/thiocarbohydrazide staining of lipids. Bacteria were localized by fluorescence (E2-  
99 Crimson signal), ultrastructure and  $^{31}\text{P}^-$  signal in the ion image. The cell nucleus was aligned  
100 using ultrastructure and the  $^{31}\text{P}^-$  signal (**Figure 1F**). Concurrent with previous CLEIM *in vitro*  
101 studies, we found that BDQ accumulated heterogeneously in LD and Mtb, with particularly  
102 high levels in infected foamy macrophages (**Figure 1F and Figure S3**). Importantly, some  
103 bacteria contained high levels of the antibiotic whereas others did not show any signal,  
104 indicating that the antibiotic is not able to evenly reach throughout intracellular bacteria present  
105 in the infected tissue (**Figure 1F**).

106  
107 Taking advantage of this method, we then focused on a more quantitative approach (**Figure**  
108 **S4**) to analyse intracellular antibiotic localisation in the lung lesions. For that, we performed a  
109 combined tile scanning by SEM and nanoSIMS covering larger areas of the tissue (**Figure 2A**).  
110 This allowed to define the distribution of BDQ in single cells and bacteria (**Movie S2**).  
111 Unexpectedly, we found that BDQ not only localised in lipophilic environments (*e.g.* in LD)  
112 but also in non-lipophilic cellular environments. Specifically, we found that BDQ strongly  
113 accumulated in polymorphonuclear cells (PMN). Antibiotic-rich PMN were present both  
114 alongside (**Figure 2B-C**) and away from areas enriched with foamy macrophages (**Figure 2D**).  
115 In contrast to macrophages where the  $^{79}\text{Br}^-$  signal was primarily associated with LD; in PMN,  
116 the  $^{79}\text{Br}^-$  signal was not only associated with granules but also with the cytosol (**Figure S5**).  
117 Thus, in tissues, BDQ accumulates in a cell-type dependent manner across two cell populations  
118 (foamy macrophages and PMN) with very different metabolic and functional properties.  
119 Confirming our previous observations, quantitative analysis revealed that BDQ  
120 heterogeneously accumulated in LD and Mtb (**Figure 2E**). Both Mtb outside and inside LD  
121 accumulated BDQ (**Figure 2E**). These PMN cells are likely neutrophils recruited to the  
122 granuloma as reported in this mouse model of TB infection[14]. Neutrophils are rich in  
123 Myeloperoxidase (MPO), a peroxidase that produces hypochlorous acid from hydrogen  
124 peroxide and chloride anion or hypobromous acid if bromide anion is present[15]. However,  
125 in untreated mice the  $^{79}\text{Br}^-$  signal was significantly lower and only slightly associated with

126 PMN granules, indicating that the  $^{79}\text{Br}^-$  signal was primarily coming from the antibiotic  
127 (**Figure S5**).  $^{79}\text{Br}^-/^{12}\text{C}^{14}\text{N}^-$  were used when comparing the BDQ-treated and non-treated  
128 tissues. The normalisation to  $^{12}\text{C}^{14}\text{N}^-$  was to compensate possible minor variations in the  
129 primary ion current during imaging.

130

### 131 **Discussion**

132 Altogether, we report the development of a correlative approach in tissue to define the  
133 subcellular localisation of antibiotics in infected cells within tissues. This multimodal imaging  
134 approach represents a powerful methodological advance to investigate if drugs reach their  
135 intracellular targets. Using this approach, we identified that in the lungs of *M. tuberculosis*  
136 infected mice, the antibiotic BDQ heterogeneously localised to intracellular bacteria and LD  
137 of foamy macrophages. We also found that BDQ significantly accumulated in specific cell  
138 types such as PMN, likely neutrophils, recruited into granulomatous lesions. Therefore,  
139 CLEIMiT enabled us to characterise the antibiotic distribution across multiple cell types,  
140 revealing multiple other niches of drug accumulation.

141

142 CLEIMiT is readily applicable to other drugs and not only for antibiotics or bromine-  
143 containing drugs but also any drugs detectable by nanoSIMS. Ion microscopy methods using  
144 nanoSIMS represents a good combination of spatial resolution and sensitivity to map drugs  
145 that contain elements other than Bromine that are low in the biological systems such as  
146 platinum [16], gold [17] and iodine [18]. What makes the approach more widely applicable is  
147 the nanoSIMS capability to detect stable isotope labelled molecules with high-resolution such  
148 as molecules that are labelled with  $^2\text{H}$  [19, 20],  $^{13}\text{C}$  [19, 21] and  $^{15}\text{N}$  [22, 23]. All of these stable  
149 isotopes can be used to label drugs of interest and mapped using the multiplexed imaging  
150 potential of CLEIMiT.

151 Importantly, in this study, we used a physiologically relevant treatment dose of BDQ. The  
152 detection limit of each elements or isotopes are different with nanoSIMS, and they are still not  
153 well documented in biological systems. However, multiple studies have demonstrated its  
154 capability to map drugs and other molecules with high resolution and sensitivity. From a  
155 pharmacokinetics/pharmacodynamics point of view, it would be important to define where and  
156 when the PMN internalise the antibiotic, since these cells are motile and actively recruited  
157 during lung inflammation. CLEIMiT also opens the possibility to define if other antibiotics  
158 currently used in the clinic are able to penetrate intracellular environments containing bacteria.  
159 Moreover, the combination of CLEIMiT with transgenic mice expressing specific fluorescent  
160 markers of cellular subtypes (e.g. myelocytic, endothelial, epithelial *etc*) will provide a suitable  
161 experimental setting to define in which cells antibiotics preferentially distribute and/or  
162 accumulate.

163

164

165

166

167

168

## 169 **Material and Methods**

170

### 171 **Murine aerosol *M. tuberculosis* infection**

172 *M. tuberculosis* H37Rv WT was kindly provided by Douglas Young (The Francis Crick  
173 Institute, UK). E2Crimson-Mtb was generated by transformation with pTEC19, a gift from  
174 Lalita Ramakrishnan (Addgene 30178). Bacteria were verified by sequencing and tested for  
175 the virulence-related lipids Phthiocerol dimycocerosates (PDIM) positivity. C3HeB/FeJ mice  
176 were bred under pathogen-free conditions at The Francis Crick Institute. Animal studies and  
177 breeding were approved by The Francis Crick Institute (London, UK) ethical committee and  
178 performed under UK Home Office project license PPL 70/8045. Infections were performed in  
179 the category 3 animal facility at The Francis Crick Institute. For aerosol infection, *M.*  
180 *tuberculosis* expressing E2crimson were grown to mid log-phase (OD<sub>600</sub> of 0.6) in 7H9  
181 (Sigma-Aldrich, M0178) supplemented with 10% albumin dextrose-catalase (BD Biosciences,  
182 212351) and 0.05% TWEEN-80 (Sigma-Aldrich, P1754). An infection sample was prepared  
183 from this, to enable delivery of approximately 100 CFU/mouse lung using a modified Glas-  
184 Col aerosol infection system.

185

### 186 **Treatment with Bedaquiline**

187 Three weeks after infection the treatment group was given 25mg/kg of Bedaquiline (BDQ,  
188 dissolved in 2-hydroxypropyl- $\beta$ -cyclodextrin) (MedChemTronica, HY-14881) daily for 5 days  
189 via oral gavage while the control group were given only 2-hydroxypropyl- $\beta$ -cyclodextrin. At  
190 the end of treatment, mice were euthanised by anaesthesia, then the lungs were either perfused  
191 with 10% neutral buffered formalin and excised (**Figure S1A**) or bacterial counts were  
192 determined by plating serial dilutions of homogenates on duplicate Middlebrook 7H11 (Sigma-  
193 Aldrich, M0428) containing OADC (BD Biosciences, 212240). Colonies were counted 2-3  
194 weeks after incubation at 37°C. The data at each time point are the means of 5 mice/group  $\pm$   
195 SEM (**Figure S1B**). CFU/lung are calculated from the average of the duplicate multiplied by  
196 the volume of the dilution and the sample volume.

197

### 198 **CLEIMiT (Correlative Light, Electron and Ion Microscopy in Tissue)**

199

#### 200 ***Micro Computed tomography ( $\mu$ CT)***

201  $\mu$ CT imaging of whole lung: Whole lungs were incubated overnight at room temperature in  
202 25% isotonic Lugol's solution w/v for contrast then in 0.75 % low melting point agarose (LMA,  
203 16520050, ThermoFisher Scientific) w/v in 200 mM HEPES incubated at 37°C for 1h. Lungs  
204 were then set in 4% LMA and imaged using a Xradia 510 Versa 3D X-ray microscopes (Zeiss,  
205 Germany) with the following acquisition setting: 0.4X objective, pixel size = 7  $\mu$ m, pixel  
206 binning of 2, source filter = LE1, Voltage = 40 kV, Wattage = 3.0 W. Tomogram reconstruction  
207 was carried out using the Zeiss Scout and Scan Software (Zeiss, Germany). Visualisation and  
208 fine measurements were taken from a 3D volume reconstruction using Zeiss XM3D viewer  
209 software (Zeiss, Germany).

210

211  $\mu$ CT imaging of resin embedded tissue: A tissue slice was imaged using a Xradia 510 Versa  
212 3D X-ray microscopes (Zeiss, Germany) with the following acquisition settings: 4X objective,

213 pixel size = 2.8  $\mu\text{m}$ , pixel binning of 2, source filter = LE2, Voltage = 40 kV, Wattage = 3.0  
214 W. Tomogram reconstruction was carried out using the Zeiss Scout and Scan Software (Zeiss,  
215 Germany). Visualisation and fine measurements were taken from a 3D volume reconstruction  
216 using Zeiss' XM3D viewer software (Zeiss, Germany). 3D measurements of the resin section  
217 were used to give precise co-ordinates for the location of the fluorescently imaged area in the  
218 resin block (**Figure S2B**) and to determine the precise angle of advance for the diamond knife  
219 when trimming the resin block.

220

### 221 *Vibratome Sections*

222 The lungs were separated into the four constituent lobes of the right lung (superior, middle,  
223 inferior, and post-caval) and left lung. Lobes were then embedded separately in 4% w/v LMA  
224 in 200 mM HEPES in agarose moulds (Sigma-Aldrich, E6032-1CS). The mould was placed  
225 on ice to cool and harden for sectioning. 100  $\mu\text{m}$  sections were cut using a VT1200S fully  
226 automated vibrating blade microtome (Leica Biosystems, Germany). Upon calibration of the  
227 instrument, sections were cut at a cutting speed of 0.35mm/sec and an amplitude of 1.0 mm.  
228 Individual sections were sequentially removed and collected in a pre-labelled 12 well plate  
229 containing 1000  $\mu\text{l}$  of 200 mM HEPES buffer.

230

### 231 *Fluorescence staining and imaging of mouse-lung sections*

232 In a 24-well plate, 100 $\mu\text{m}$  lung slices were washed twice in 200 mM HEPES buffer then  
233 incubated for 20 min in a staining solution containing: 0.715  $\mu\text{M}$  DAPI (4',6-diamidino-2-  
234 phenylindole) (ThermoFisher Scientific D1306), 10 mg/L BODIPY 493/503 (4,4-difluoro-  
235 1,3,5,7,8-pentamethyl-4-bora-3a,4a-diaza-s-indacene) (Invitrogen D3922) in 200 mM HEPES  
236 buffer. Slices were washed twice with 200 mM HEPES and transferred to a glass slide and  
237 positioned to lie flat, unfolded across the surface. Excess buffer was removed, along with any  
238 remaining agarose and 10  $\mu\text{L}$  DAKO fluorescent mounting medium (Agilent S3023) added. A  
239 cover glass (NA=1.5) was gently placed upon the tissue and the medium allowed to set. An  
240 inverted Leica TCS SP8 microscope running LAS X acquisition software with Navigator  
241 module (Leica Microsystems, Germany), equipped with 405 nm, Argon laser, 561 nm, 633 nm,  
242 and HyD detectors was used to image the tissue fluorescence with the following Lasers: 405nm  
243 (DAPI), 488nm (BODIPY) and 561nm (Mtb-E2Crimson). In the first instance, the entire tissue  
244 section was imaged with a tile scan using the 10x objective lens. Regions of interest (ROI)  
245 were then identified based upon areas of tissue showing high degrees of cellular infiltration,  
246 indicated by DAPI staining, and the accumulation of highly-lipid foamy cells, indicated by  
247 BODIPY staining. Selected ROI were then imaged at higher resolution using a 40x oil  
248 objective and z-stack. Voxel size was adjusted to half the theoretical limit of the lens in x and  
249 y and 0.5  $\mu\text{m}$  in z. Fields of view were chosen to include cellular architecture such as airway  
250 passages as well as erythrocytes and vessels of the circulatory system, which appear as open  
251 space in the tissue, and can later be used as landmarks to help locate the ROI in downstream  
252 correlation. After imaging, slides were submerged in 200 mM HEPES and incubated at 4°C  
253 until the mounting medium dissolved and the tissue was released. Slices were then stored in  
254 1.25 % glutaraldehyde (Sigma G5882), in 200 mM HEPES (Sigma-Aldrich H0887), pH 7.4  
255 until embedding.

256

257 ***Resin embedding***

258 Fluorescently imaged slices were processed for Scanning Electron Microscopy (SEM) and  
259 nanoscale secondary ion mass spectrometry (nanoSIMS) in a Biowave Pro (Pelco, USA) with  
260 use of microwave energy and vacuum. Samples (~0.3-0.4 mm<sup>3</sup>) were twice washed in HEPES  
261 (Sigma-Aldrich H0887) at 250 W for 40 s, post-fixed using a mixture of 2% osmium tetroxide  
262 (Taab O011) 1.5% potassium ferricyanide (Taab, P018) (v/v) at equal ratio for 14 min at 100  
263 W power (with/without vacuum 20 <sup>202</sup>Hg at 2-min intervals). Samples were washed with  
264 distilled water twice on the bench and twice in the Biowave 250 W for 40 s,  
265 1% thiocarbohydrazide (Sigma-Aldrich 223220) in distilled water (v/v) for 14 min at 100 W  
266 power (with/without vacuum 20 <sup>202</sup>Hg at 2 min intervals), washing cycle was repeated as before,  
267 then incubated with 2 % osmium tetroxide (Taab, O011) distilled water (w/v) for 14 min at  
268 100 W power (with/without vacuum 20 <sup>202</sup>Hg at 2 min intervals). Samples were washed as  
269 before. Samples were stained with 1 % aqueous uranyl acetate (Agar scientific AGR1260A) in  
270 distilled water (w/v) for 14 min at 100 W power (with/without vacuum 20 <sup>202</sup>Hg at 2 min  
271 intervals) then washed using the same settings as before. Samples were dehydrated using a  
272 step-wise ethanol series of 50, 75, 90 and 100 %, then washed 4x in absolute acetone at 250 W  
273 for 40 s per step. Samples were infiltrated with a dilution series of 25, 50, 75, 100 % Durcupan  
274 ACM® (Sigma-Aldrich 44610) (v/v) resin to acetone. Each step was for 3 min at 250 W power  
275 (with/without vacuum 20 <sup>202</sup>Hg at 30 s intervals). Samples were then cured for a minimum of  
276 48 h at 60°C.

277 ***Resin block trimming***

278 Referring to measurements from the 3D volume reconstruction, generated by  $\mu$ CT, the sample  
279 block was trimmed, coarsely by a razor blade then finely trimmed using a 35° ultrasonic,  
280 oscillating diamond knife (DiATOME, Switzerland) set at a cutting speed of 0.6 mm/s, a  
281 frequency set by automatic mode and a voltage of 6.0 V, on a ultramicrotome EM UC7 (Leica  
282 Microsystems, Germany) to remove all excess resin and tissue surrounding the ROI. Precise  
283 measurements, derived from the  $\mu$ CT reconstruction, were used to further cut into the tissue,  
284 to the depth corresponding with the fluorescent area previously imaged.

285

286 **Nanoscale secondary ion mass spectrometry (nanoSIMS)**

287 The sections were imaged by SEM and nanoSIMS as previously described[10]. 500 nm  
288 sections were cut using ultramicrotome EM UC7 (Leica Microsystems, Germany) and mounted  
289 on 7 mm by 7 mm silicon wafers. Sections on silicon wafers were imaged using a FEI Verios  
290 SEM (Thermo Fisher Scientific, USA) with a 1 kV beam with the current at 200 pA. The same  
291 sections were then coated with 5 nm gold and transferred to a nanoSIMS 50L instrument  
292 (CAMECA, France). The regions that were imaged by SEM were identified using the optical  
293 microscope in the nanoSIMS. A focused <sup>133</sup>Cs<sup>+</sup> beam was used as the primary ion beam to  
294 bombard the sample; secondary ions (<sup>12</sup>C<sup>-</sup>, <sup>12</sup>C<sup>14</sup>N<sup>-</sup>, <sup>79</sup>Br<sup>-</sup>, <sup>32</sup>S<sup>-</sup> and <sup>31</sup>P<sup>-</sup>) and secondary  
295 electrons were collected. A high primary beam current of ~1.2 nA was used to scan the sections  
296 to remove the gold coating and implant <sup>133</sup>Cs<sup>+</sup> to reach a dose of 1x10<sup>17</sup> ions/cm<sup>2</sup> at the steady  
297 state of secondary ions collected. Identified regions of interest were imaged with a ~3.5 pA  
298 beam current and a total dwell time of 10 ms/pixel. Scans of 512 × 512 pixels were obtained.

299

300

301 ***Image alignment***

302 Tissue derived micrograph and nanoSIMS/micrograph correlation: ion and fluorescent images  
303 were aligned to EM micrographs with Icy 2.0.3.0 software (Institut Pasteur, France), using the  
304 ec-CLEM Version 1.0.1.5 plugin. No less than 10 independent fiducials were chosen per  
305 alignment for 2D image registration. When the fiducial registration error was greater than the  
306 predicted registration error, a non-rigid transformation (a nonlinear transformation based on  
307 spline interpolation, after an initial rigid transformation) was applied as previously  
308 described[24].

309  
310 ***Quantification and Statistical analysis***

311 Ion quantification: secondary Ion signal intensities were quantified in ImageJ with the  
312 OpenMIMS v3.0.5 plugin.

313  
314 Quantification of BDQ within bacteria: bacteria ( $n = 472$ ) were manually outlined with the  
315 assistance of SEM images and the  $^{31}\text{P}^-$  signal. Ratio values ( $^{79}\text{Br}^-/^{12}\text{C}^{14}\text{N}^-$ ) for bacteria were  
316 divided by the area of their respective ROI to give mean normalised pixel intensity in arbitrary  
317 units (AU) for each condition. Mean normalised pixel intensity in arbitrary units (AU) per ROI  
318 was plotted against condition using Graphpad Prism 8 software and two-tailed p-value was  
319 determined by an unpaired, non-parametric Mann-Whitney U test to assess statistical  
320 significance.

321  
322 Quantification of BDQ in lipid droplets: lipid droplets ( $n = 1404$ ) were outlined using the  
323 ( $^{32}\text{S}^-/1$ ) ratio value. The resulting ratio image was summed and processed with a gaussian blur  
324 filter (sigma radius = 2 pixels). A threshold was applied to mask the image. ROIs were  
325 identified by particle analysis, and verified by comparison with the respective SEM image.  
326 Masked areas were overlaid to the  $^{79}\text{Br}^-/^{12}\text{C}^{14}\text{N}^-$  ratio image of the same area of tissue. ROIs  
327 with less than 5 pixels in size were excluded from the analysis. Mean normalised pixel intensity  
328 in arbitrary units (AU) per ROI was plotted against condition using GraphPad Prism 8 software.  
329 Two-tailed p-value was determined by an unpaired, non-parametric Mann-Whitney U test to  
330 assess statistical significance.

331  
332 Quantification of BDQ in bacteria inside LD: bacteria ( $n = 282$ ) were manually outlined and  
333 localisation defined to be either inside lipid droplets (inLD) or outside lipid droplets (outLD)  
334 with the assistance of SEM images and the  $^{31}\text{P}^-$  and  $^{32}\text{S}^-$  signal. Ratio values ( $^{79}\text{Br}^-/^{12}\text{C}^{14}\text{N}^-$ )  
335 for bacteria were divided by the area of their respective ROI to give mean normalised pixel  
336 intensity in arbitrary units (AU) for each condition. Two-tailed p-values were determined by  
337 an unpaired, non-parametric Kruskal-Wallis test with Dunn's correction to assess statistical  
338 significance.

339  
340 Quantification of BDQ in PMN: Polymorphonuclear cells ( $n = 22$ ) were manually outlined  
341 with the assistance of SEM images and the  $^{12}\text{C}^{14}\text{N}^-$  signal. Ratio values ( $^{79}\text{Br}^-/^{12}\text{C}^{14}\text{N}^-$ ) for  
342 PMN were divided by the area of their respective ROI to give mean normalised pixel intensity  
343 in arbitrary units (AU) for each condition. Mean normalised pixel intensity in arbitrary units  
344 (AU) per ROI was plotted against condition using Graphpad Prism 8 software. Two-tailed p-



345 value was determined by an unpaired, non-parametric Mann-Whitney U test to assess  
346 statistical significance.

347

### 348 **Acknowledgements**

349 We thank Elliott Bernard (The Francis Crick Institute) for making the Mtb fluorescent strain  
350 used in this work and Gareth Griffiths (University of Oslo) for useful suggestions on the  
351 manuscript. We are also grateful to the Advanced Light Microscopy STP, the Electron  
352 Microscopy STP and Biological Research Facility at the Crick for their support in various  
353 aspects of the work. We thank Paul Guagliardo, Jeremy Bougoure and Alexandra Suvorova  
354 (Centre for Microscopy, Characterisation and Analysis, University of Western Australia) for  
355 their support for nanoSIMS and SEM imaging. This work was supported by the Francis Crick  
356 Institute (to MGG), which receives its core funding from Cancer Research UK (FC001092),  
357 the UK Medical Research Council (FC001092), and the Wellcome Trust (FC001092). HJ is  
358 supported by an Australian Research Council Discovery Early Career Researcher Award.

359

### 360 **Author Contributions**

361 MGG and HJ conceived and supervised the project. AF, DJG, AR and HJ performed the  
362 experiments. AF performed the sectioning, EM sample preparation and the full correlative  
363 approach. DJG performed the fluorescence analysis. HJ performed the SEM and nanoSIMS.  
364 AR carried out the mouse infections, CFU analysis and tissue collection. AF, DJG and HJ  
365 analysed the data. MGG wrote the manuscript and prepared the figures with input from AF.  
366 All authors discussed the results and implications and commented on the manuscript at all  
367 stages.

368

### 369 **Competing Interests statement**

370 The authors have no competing interests.

371

### 372 **References**

373

- 374 1. Bumann D. Heterogeneous host-pathogen encounters: act locally, think globally. *Cell*  
375 *Host Microbe*. 2015;17(1):13-9. Epub 2015/01/16. doi: 10.1016/j.chom.2014.12.006. PubMed  
376 PMID: 25590757.
- 377 2. Bumann D, Fanous J, Li J, Goormaghtigh F. Antibiotic chemotherapy against  
378 heterogeneous pathogen populations in complex host tissues. *F1000Res*. 2019;8. Epub  
379 2019/11/19. doi: 10.12688/f1000research.19441.1. PubMed PMID: 31737252; PubMed  
380 Central PMCID: PMC6807158.
- 381 3. Connolly LE, Edelstein PH, Ramakrishnan L. Why is long-term therapy required to  
382 cure tuberculosis? *PLoS Med*. 2007;4(3):e120. Epub 2007/03/29. doi:  
383 10.1371/journal.pmed.0040120. PubMed PMID: 17388672; PubMed Central PMCID:  
384 PMC1831743.
- 385 4. Dartois V. The path of anti-tuberculosis drugs: from blood to lesions to mycobacterial  
386 cells. *Nat Rev Microbiol*. 2014;12(3):159-67. Epub 2014/02/04. doi: 10.1038/nrmicro3200.  
387 PubMed PMID: 24487820; PubMed Central PMCID: PMC4341982.

- 388 5. Prideaux B, Via LE, Zimmerman MD, Eum S, Sarathy J, O'Brien P, et al. The  
389 association between sterilizing activity and drug distribution into tuberculosis lesions. *Nat*  
390 *Med.* 2015;21(10):1223-7. Epub 2015/09/08. doi: 10.1038/nm.3937. PubMed PMID:  
391 26343800; PubMed Central PMCID: PMCPMC4598290.
- 392 6. Blanc L, Daudelin IB, Podell BK, Chen PY, Zimmerman M, Martinot AJ, et al. High-  
393 resolution mapping of fluoroquinolones in TB rabbit lesions reveals specific distribution in  
394 immune cell types. *Elife.* 2018;7. Epub 2018/11/15. doi: 10.7554/eLife.41115. PubMed PMID:  
395 30427309; PubMed Central PMCID: PMCPMC6249001.
- 396 7. Jiang H, Passarelli MK, Munro PM, Kilburn MR, West A, Dollery CT, et al. High-  
397 resolution sub-cellular imaging by correlative NanoSIMS and electron microscopy of  
398 amiodarone internalisation by lung macrophages as evidence for drug-induced  
399 phospholipidosis. *Chem Commun (Camb).* 2017;53(9):1506-9. Epub 2017/01/14. doi:  
400 10.1039/c6cc08549k. PubMed PMID: 28085162.
- 401 8. Proetto MT, Callmann CE, Cliff J, Szymanski CJ, Hu D, Howell SB, et al. Tumor  
402 Retention of Enzyme-Responsive Pt(II) Drug-Loaded Nanoparticles Imaged by Nanoscale  
403 Secondary Ion Mass Spectrometry and Fluorescence Microscopy. *ACS Cent Sci.*  
404 2018;4(11):1477-84. Epub 2018/12/18. doi: 10.1021/acscentsci.8b00444. PubMed PMID:  
405 30555899; PubMed Central PMCID: PMCPMC6276039.
- 406 9. Jiang H, Kilburn MR, Decelle J, Musat N. NanoSIMS chemical imaging combined with  
407 correlative microscopy for biological sample analysis. *Curr Opin Biotechnol.* 2016;41:130-5.  
408 Epub 2016/08/11. doi: 10.1016/j.copbio.2016.06.006. PubMed PMID: 27506876.
- 409 10. Greenwood DJ, Dos Santos MS, Huang S, Russell MRG, Collinson LM, MacRae JI, et  
410 al. Subcellular antibiotic visualization reveals a dynamic drug reservoir in infected  
411 macrophages. *Science.* 2019;364(6447):1279-82. Epub 2019/06/30. doi:  
412 10.1126/science.aat9689. PubMed PMID: 31249058.
- 413 11. Driver ER, Ryan GJ, Hoff DR, Irwin SM, Basaraba RJ, Kramnik I, et al. Evaluation of  
414 a mouse model of necrotic granuloma formation using C3HeB/FeJ mice for testing of drugs  
415 against *Mycobacterium tuberculosis*. *Antimicrob Agents Chemother.* 2012;56(6):3181-95.  
416 Epub 2012/04/04. doi: 10.1128/AAC.00217-12. PubMed PMID: 22470120; PubMed Central  
417 PMCID: PMCPMC3370740.
- 418 12. Irwin SM, Prideaux B, Lyon ER, Zimmerman MD, Brooks EJ, Schrupp CA, et al.  
419 Bedaquiline and Pyrazinamide Treatment Responses Are Affected by Pulmonary Lesion  
420 Heterogeneity in *Mycobacterium tuberculosis* Infected C3HeB/FeJ Mice. *ACS Infect Dis.*  
421 2016;2(4):251-67. Epub 2016/05/27. doi: 10.1021/acsinfectdis.5b00127. PubMed PMID:  
422 27227164; PubMed Central PMCID: PMCPMC4874602.
- 423 13. Irwin SM, Driver E, Lyon E, Schrupp C, Ryan G, Gonzalez-Juarrero M, et al. Presence  
424 of multiple lesion types with vastly different microenvironments in C3HeB/FeJ mice following  
425 aerosol infection with *Mycobacterium tuberculosis*. *Dis Model Mech.* 2015;8(6):591-602.  
426 Epub 2015/06/04. doi: 10.1242/dmm.019570. PubMed PMID: 26035867; PubMed Central  
427 PMCID: PMCPMC4457037.
- 428 14. Abel B, Thieblemont N, Quesniaux VJ, Brown N, Mpagi J, Miyake K, et al. Toll-like  
429 receptor 4 expression is required to control chronic *Mycobacterium tuberculosis* infection in  
430 mice. *J Immunol.* 2002;169(6):3155-62. Epub 2002/09/10. doi: 10.4049/jimmunol.169.6.3155.  
431 PubMed PMID: 12218133.

- 432 15. Gaut JP, Yeh GC, Tran HD, Byun J, Henderson JP, Richter GM, et al. Neutrophils  
433 employ the myeloperoxidase system to generate antimicrobial brominating and chlorinating  
434 oxidants during sepsis. *Proc Natl Acad Sci U S A*. 2001;98(21):11961-6. Epub 2001/10/11.  
435 doi: 10.1073/pnas.211190298. PubMed PMID: 11593004; PubMed Central PMCID:  
436 PMC59821.
- 437 16. Hu D, Yang C, Lok CN, Xing F, Lee PY, Fung YME, et al. An Antitumor Bis (N-  
438 Heterocyclic Carbene) Platinum (II) Complex That Engages Asparagine Synthetase as an  
439 Anticancer Target. *Angewandte Chemie International Edition*. 2019;58(32):10914-8.
- 440 17. Tong K-C, Lok C-N, Wan P-K, Hu D, Fung YME, Chang X-Y, et al. An anticancer  
441 gold (III)-activated porphyrin scaffold that covalently modifies protein cysteine thiols.  
442 *Proceedings of the National Academy of Sciences*. 2020;117(3):1321-9.
- 443 18. Jiang H, Passarelli MK, Munro PM, Kilburn MR, West A, Dollery CT, et al. High-  
444 resolution sub-cellular imaging by correlative NanoSIMS and electron microscopy of  
445 amiodarone internalisation by lung macrophages as evidence for drug-induced  
446 phospholipidosis. *Chemical Communications*. 2017;53(9):1506-9.
- 447 19. He C, Weston TA, Jung RS, Heizer P, Larsson M, Hu X, et al. NanoSIMS Analysis of  
448 Intravascular Lipolysis and Lipid Movement across Capillaries and into Cardiomyocytes. *Cell*  
449 *Metab*. 2018;27(5):1055-66 e3. doi: 10.1016/j.cmet.2018.03.017. PubMed PMID: 29719224.
- 450 20. Jiang H, He C, Fong LG, Young SG. The fatty acids from LPL-mediated processing of  
451 triglyceride-rich lipoproteins are taken up rapidly by cardiomyocytes. *Journal of Lipid*  
452 *Research*. 2020;jlrl. ILR120000783.
- 453 21. Hu X, Matsumoto K, Jung RS, Weston TA, Heizer PJ, He C, et al. GPIHBP1 expression  
454 in gliomas promotes utilization of lipoprotein-derived nutrients. *Elife*. 2019;8:e47178.
- 455 22. Jiang H, Favaro E, Goulbourne C, Rakowska P, Hughes G, Ryadnov M, et al. Stable  
456 isotope imaging of biological samples with high resolution secondary ion mass spectrometry  
457 and complementary techniques. *Methods*. 2014;68(2):317-24.
- 458 23. He C, Hu X, Jung RS, Weston TA, Sandoval NP, Tontonoz P, et al. High-resolution  
459 imaging and quantification of plasma membrane cholesterol by NanoSIMS. *Proceedings of the*  
460 *National Academy of Sciences*. 2017;114(8):2000-5.
- 461 24. Paul-Gilloteaux P, Heiligenstein X, Belle M, Domart MC, Larijani B, Collinson L, et  
462 al. eC-CLEM: flexible multidimensional registration software for correlative microscopies.  
463 *Nat Methods*. 2017;14(2):102-3. Epub 2017/02/01. doi: 10.1038/nmeth.4170. PubMed PMID:  
464 28139674.

465  
466

## 467 **Figure legends**

468

### 469 **Figure 1. The CLEIMiT workflow and correlative imaging of BDQ in *M. tuberculosis*-** 470 **infected foamy macrophages within lung tissue.**

471 (A) Diagram illustrating the *in vivo* experimental setting. C3HeB/FeJ mice were infected with  
472 *Mycobacterium tuberculosis* H37Rv expressing E2-Crimson (Mtb-E2Crimson) by aerosol.  
473 After 21 days, infected mice were treated with 25mg/kg of Bedaquiline (BDQ) or vehicle daily  
474 for 5 days via oral gavage. Lungs were removed, fixed with 10% formalin, contrasted and

475 embedded in low melting point agarose then imaged by  $\mu$ CT for sequential vibratome  
476 sectioning.

477 (B) Fluorescence microscopy: A tile scan of a tissue section ( $\sim 100 \mu\text{m}$  thickness) stained with  
478 DAPI (blue) and BODIPY (green), granulomatous lesions are marked with a solid white line  
479 to indicate the boundary (scale bar =  $1000 \mu\text{m}$ ).

480 (C) Light microscopy of a Region of Interest (ROI): (i) zoomed fluorescence image (white box  
481 from figure 1B), “landmarks” used for downstream location recognition, are indicated by the  
482 solid white boundary lines (scale bar =  $500 \mu\text{m}$ ). white rectangle shows the ROI for  
483 downstream analysis. (ii) A confocal image of the region indicated by the white box above  
484 shows an area of strong cellular infiltration and the accumulation of BODIPY (green) positive  
485 cells. Cells infected with Mtb-E2Crimson (red) are also visible throughout this region. The  
486 same landmarks marked in image (i) are present. white box indicates the selected infected  
487 foamy cell. Scale bar =  $100 \mu\text{m}$ . (iii) Zoomed in image showing the selected foamy cell  
488 infected with Mtb-E2Crimson (red) for correlative analysis. Scale bar =  $5 \mu\text{m}$ .

489 (D) Electron microscopy of the ROI: (ii) tissue overview ( $600\times$  magnification) with landmarks  
490 present, white box indicates the selected infected foamy cell. Scale bar =  $100 \mu\text{m}$ . (iii) Zoomed  
491 in image showing the selected foamy cell infected with Mtb ( $15,000\times$  magnification). Scale  
492 bar =  $5 \mu\text{m}$ .

493 (E) Ion microscopy of the selected cell: Panel shows the individual nanoSIMS images for the  
494 following ion signals from left to right;  $^{12}\text{C}^{14}\text{N}^-$ ,  $^{31}\text{P}^-$ ,  $^{32}\text{S}^-$  and  $^{79}\text{Br}^-$ .

495 (F) Correlative light, electron and ion microscopy in tissue (CLEIMiT): Left, a correlated  
496 image overlaying fluorescent signal from BODIPY (green) and Mtb-E2Crimson (red) against  
497 the SEM image. Right, a correlated image overlaying the  $^{79}\text{Br}^-$  and  $^{31}\text{P}^-$  signals with the SEM  
498 image. Center, the corresponding SEM image of the infected foamy cell. Scale bar =  $5 \mu\text{m}$ .

499

500 **Figure 2. Quantitative distribution of BDQ reveals intracellular distribution of BDQ in**  
501 **foamy macrophages and PMN within granulomatous lesions.**

502 (A) Left, a tiled SEM image of a region of granulomatous lung tissue indicating the zoomed  
503 areas. Scale bar =  $40 \mu\text{m}$ . Right, a mosaic of 49 individual ion micrographs showing the  
504 quantitative distribution of ion signals in the respective area of tissue. Sulphur  $^{32}\text{S}^-$  is shown in  
505 green, bromine  $^{79}\text{Br}^-$  in red and phosphorus  $^{31}\text{P}^-$  in blue.

506 (B) Polymorphonuclear cells (PMN) are recruited to the foamy macrophage rich lesions. SEM  
507 of zoom 1 (left) and the distribution of secondary ions  $^{31}\text{P}^-$ ,  $^{79}\text{Br}^-$  and  $^{32}\text{S}^-$  (right). Overlaid  
508 image between SEM (left) and Secondary ion (right) is shown in the center. PMN are  
509 demarcated by the white boundary line. Scale bar =  $5 \mu\text{m}$

510 (C) An infected PMN from panel B showing strong accumulation of BDQ. Overlay between  
511 the SEM and secondary ion signals for  $^{79}\text{Br}^-$  (red) and  $^{31}\text{P}^-$  (blue) is depicted in the center.  
512 White arrowheads indicate intracellular bacteria. Scale bar =  $5 \mu\text{m}$ .

513 (D) BDQ strongly enriched in PMN that are not only associated with the foamy macrophage-  
514 enriched areas. SEM of zoom 2 (left) and the distribution of secondary ions  $^{31}\text{P}^-$ ,  $^{79}\text{Br}^-$  and  $^{32}\text{S}^-$   
515 (right). Overlaid image of SEM and secondary ions is depicted at the center. Demarcation of  
516 PMN is outlined by the white boundary line. Scale bar =  $5 \mu\text{m}$

517 (E) Left panel: Quantitative analysis of BDQ associated with Mtb in BDQ treated and untreated  
518 mice. Center panel: Quantitative analysis of BDQ associated with LD in BDQ treated and

519 untreated mice. Right panel: BDQ association to Mtb inside or outside LD in untreated vs  
520 BDQ-treated mice. Data show mean  $\pm$  standard deviation. t-test adjusted for multiple  
521 comparisons. ns=non-significant; p value is as shown. At least 140 objects were counted from  
522 each treatment condition.

523

## 524 **Supplementary information**

525

### 526 **Supplementary Figure 1. Overview of the infection model and treatment.**

527 (A) Diagram of the infection and treatment experimental setting.

528 (B) Colony forming units (CFU) in the lungs of mice at day zero of infection (inoculum) and  
529 treated with either BDQ or vehicle.

530 (C) Micro Computed tomography ( $\mu$ CT) of whole lung showing granulomatous lesions.

531

### 532 **Supplementary Figure 2. Strategy for correlative light (fluorescence), electron (SEM) and 533 ion (nanoSIMS) microscopy.**

534 (A) Diagram of the sectioning strategy for correlation, including the different imaging  
535 modalities and thickness.  $A^\circ$  represents the need to calculate and adjust the angle of incidence  
536 of the diamond knife with the resin block so as to achieve parallel sectioning from the surface  
537 of the tissue, through the entire block.

538 (B) Correlation between fluorescent ROI and  $\mu$ CT of resin embedded section and positioning  
539 localisation of the SEM section for correlation between nanoSIMS/SEM and fluorescence.  
540 Middle panels show different orthogonal slices of the 3D section used to localise area, and  
541 calculate angle and depth for further sectioning. The intersecting lines indicate the precise  
542 location of the target cell within the resin embedded section. Distances which are used to  
543 calculate angles are shown in blue numbers. These localisations were used to zoom in the ROI  
544 (zoom) and obtain the SEM image corresponding to the fluorescent image in the upper panel.

545

### 546 **Supplementary Figure 3. BDQ accumulates heterogeneously in LD and Mtb, with 547 particularly high levels in infected foamy macrophages.**

548 (A) Fluorescent microscopy of a Region of Interest (ROI) as in Figure 1: (i) cellular infiltration  
549 and the accumulation of BODIPY (green) positive cells. Cells infected with Mtb-E2Crimson  
550 (red) are also visible throughout this region. Scale bar = 100  $\mu$ m. (ii) Zoomed in image showing  
551 the selected foamy cell infected with Mtb-E2Crimson (red) from (i) for correlative analysis.  
552 Scale bar = 15  $\mu$ m. Lower panels show the ion microscopy for the selected cell including  
553  $^{12}\text{C}^{14}\text{N}^-$ ,  $^{31}\text{P}^-$ ,  $^{79}\text{Br}^-$  and  $^{32}\text{S}^-$ . Compass indicates the orientations of secondary ion images with  
554 regard to the fluorescent image above.

555 (B) Correlative light, electron and ion microscopy in tissue (CLEIMiT): Right, a correlated  
556 image overlaying the  $^{79}\text{Br}^-$  and  $^{31}\text{P}^-$  signals with the SEM image. Center, the corresponding  
557 SEM image of the infected foamy cell. Left, a correlated image overlaying fluorescent signal  
558 from BODIPY (green) and Mtb-E2Crimson (red) against the SEM image. Scale bar = 5  $\mu$ m.

559

### 560 **Supplementary Figure 4. Quantitative analysis workflow of BDQ levels in Mtb and LD**

561 (A) Masking of Mtb profiles aided by the combination of the SEM profiles and  $^{31}\text{P}^-$  signal and  
562 measurement of the  $^{79}\text{Br}^-$  signal associated with Mtb (see methods). Scale bar = 5  $\mu$ m.

563 (B) Masking of LD profiles aided by the combination of the SEM profiles and  $^{32}\text{S}^-$  signal and  
564 measurement of the  $^{79}\text{Br}^-$  signal associated with LD (see methods). Scale bar = 5  $\mu\text{m}$ .

565

566 **Supplementary Figure 5. Bromine signal from PMN is primarily associated with BDQ**

567 (A) Representative SEM/nanoSIMS correlated images of PMN in granulomatous lesions in  
568 lungs of mice treated with vehicle (untreated) and BDQ (treated).

569 (B) Quantitative analysis of  $^{79}\text{Br}^-$  signal in PMN. Data show mean  $\pm$  standard deviation. t-test  
570 adjusted for multiple comparisons. ns=non-significant; p value is as shown. A total of 22  
571 PMN were counted. Scale bar = 5  $\mu\text{m}$ .

572

573 **Movie S1:**  $\mu\text{CT}$  of infected lungs showing lesions.

574

575 **Movie S2:** Ion images and intracellular localisation of BDQ in different cell types within  
576 granulomatous lesions.

577

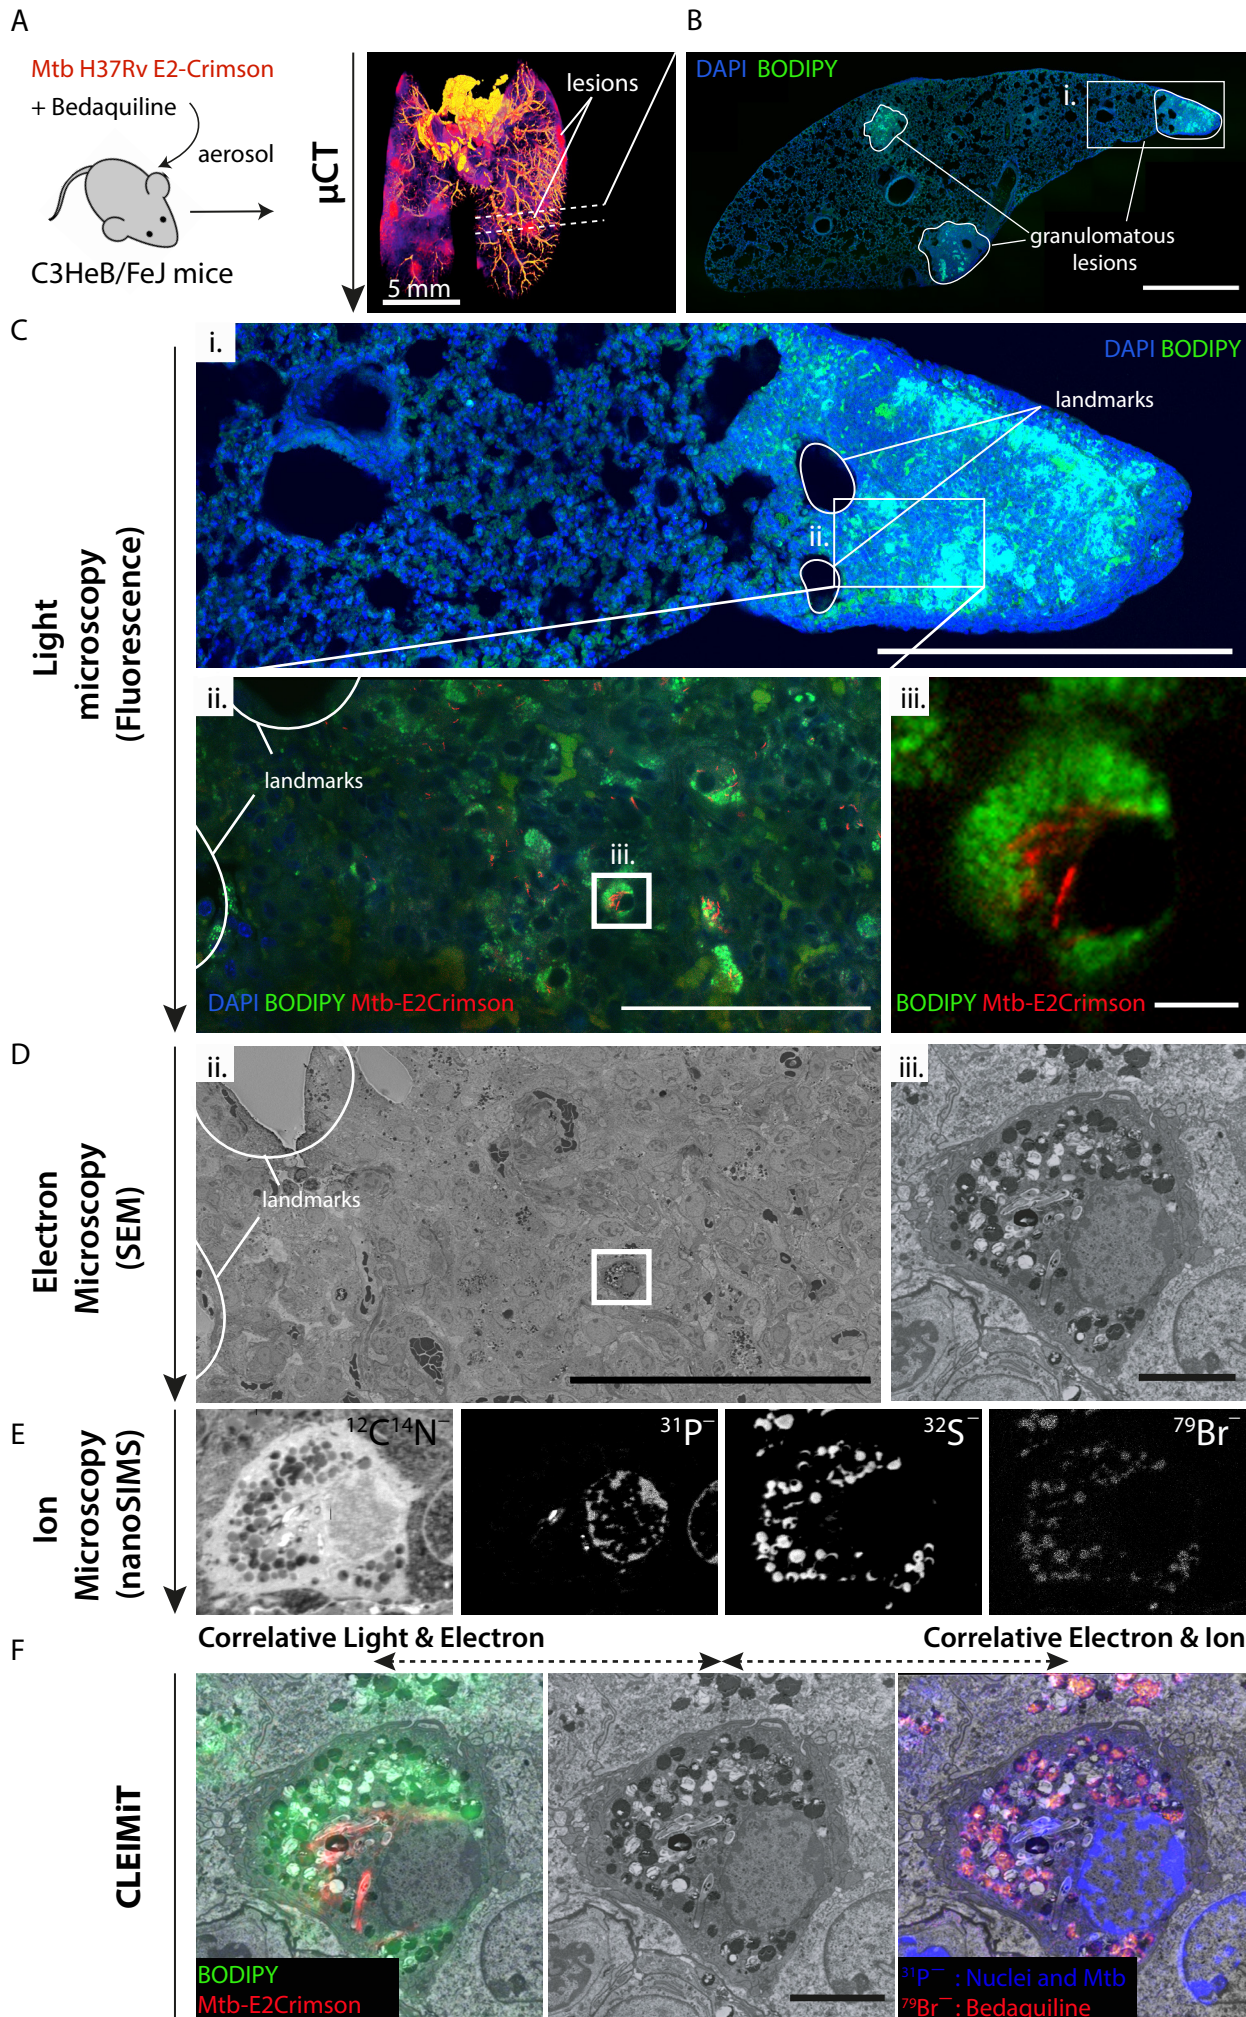

Figure 2

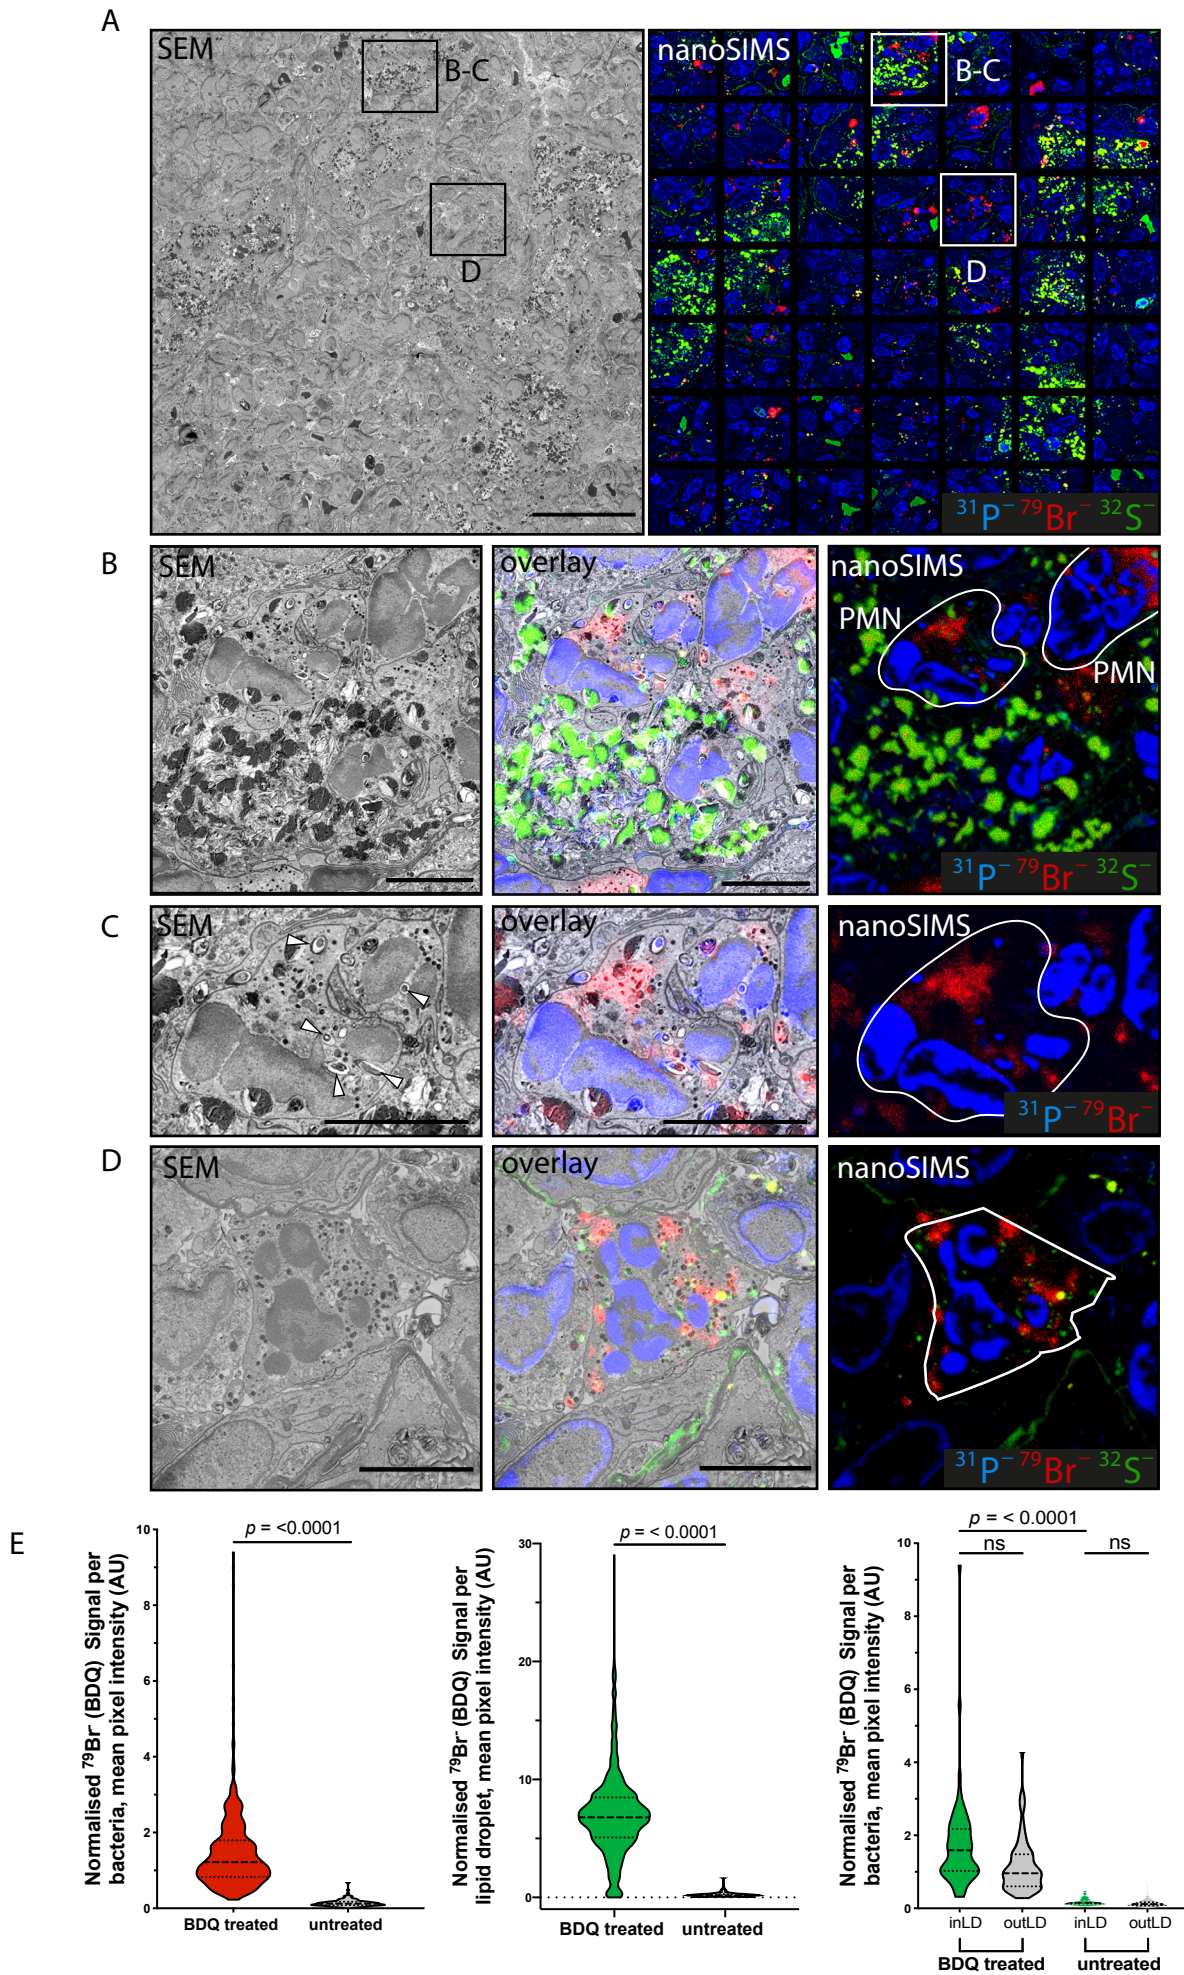

Source: https://www.biorxiv.org/content/10.1101/2020.08.05.237537v1.full.pdf
